# Supplementary material for: Visual Detection of Dengue-1 RNA Using Gold Nanoparticle-Based Lateral Flow Biosensor
Source: PubMed Central journal article supplement (PMC6787709; doi:10.3390/diagnostics9030074), 2019-07-11
Supplement: diagnostics-09-00074-s001.pdf [file diagnostics-09-00074-s001.pdf]

## Supplementary Material

**A**

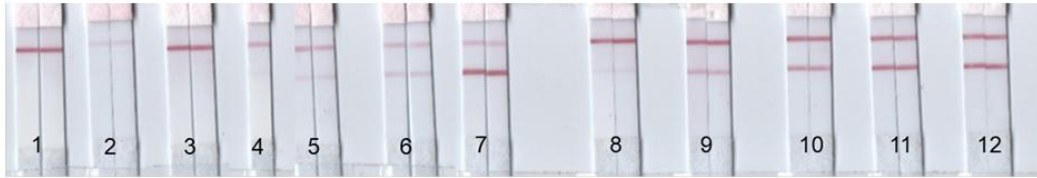

**B**

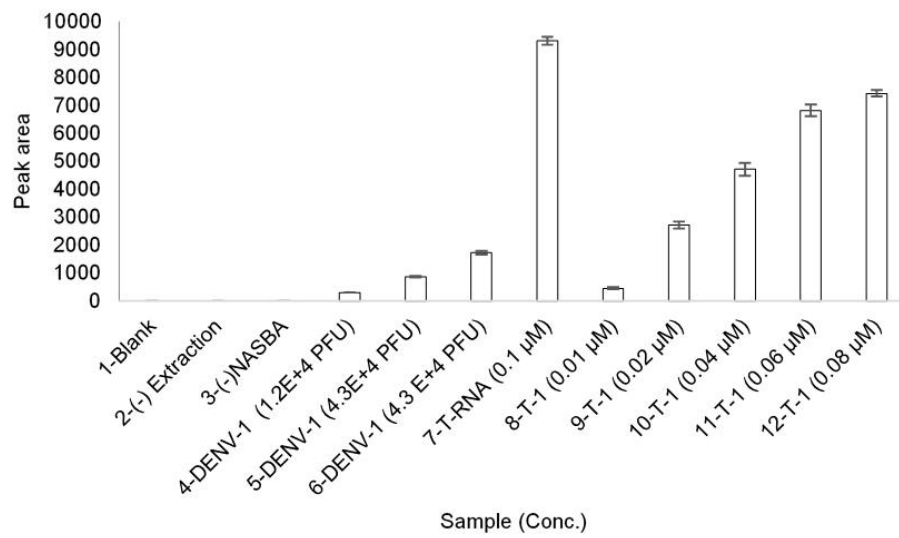

**Figure 1.** (A) Photo images of LFB strips tested with different samples and (B) the corresponding histogram. The number sequence of LFB strips corresponds to the same sequence in the histogram.
